# Supplementary material for: OsPRR37 and Ghd7 are the major genes for general combining ability of DTH, PH and SPP in rice
Source: PubMed Central journal article supplement (PMC4523830; doi:10.1038/srep12803), 2015-08-04
Supplement: srep12803-s1.pdf [file srep12803-s1.pdf]

***OsPRR37* and *Ghd7* are the major genes for general combining ability of DTH,**

**PH and SPP in rice**

Chuan Liu, Gaoyuan Song, Yanhao Zhou, Xuefeng Qu, Zhibin Guo, Zhenwei Liu,  
Daiming Jiang, Daichang Yang \*

State Key Laboratory of Hybrid Rice and College of Life Sciences, Wuhan University,  
430072, China

\*Corresponding author: Daichang Yang

Address: State Key Laboratory of Hybrid Rice, College of Life Sciences, Wuhan  
University, LuoJia Hill, Wuhan, Hubei Province 430072, China.

Tel: 86-27-6875-4680

Fax: 86-27-8757-0670

E-mail: [dyang@whu.edu.cn](mailto:dyang@whu.edu.cn)

## Supplementary Figures

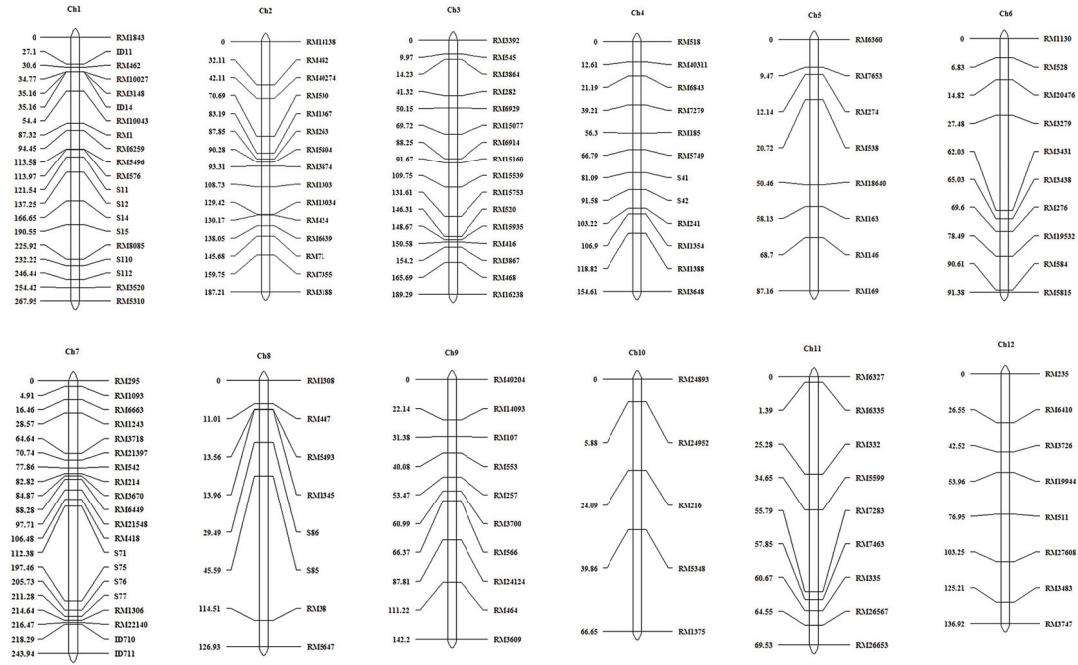

**Supplementary Figure S1. Genetic linkage map constructed from 141 molecular markers using 139 plants of the F2 population.**

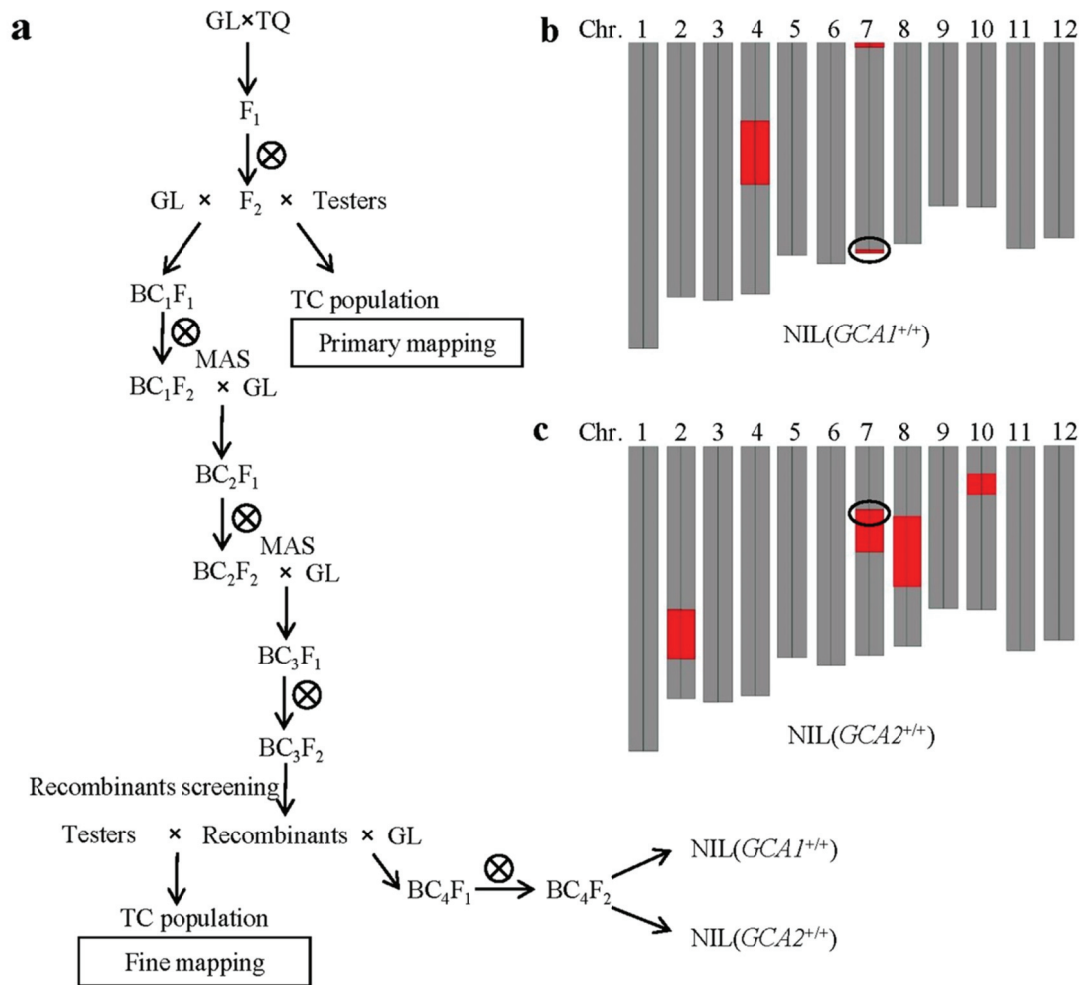

**Supplementary Figure S2. Construction of populations for GCA QTL mapping and graphical genetic background for NIL(*GCA1*<sup>+/+</sup>) and NIL(*GCA2*<sup>+/+</sup>).** (a) The TC population used for primary mapping was derived from crosses of the individual plants of F<sub>2</sub> population with five testers. The TC population used for fine mapping was derived from test crosses of the recombinant plant with five testers. TQ (donor) and GL (recurrent) were used as the parents. (b, c) Graphical genetic background for NIL(*GCA1*<sup>+/+</sup>) and NIL(*GCA2*<sup>+/+</sup>) determined by 139 genome-wide SSR and InDel markers. Gray and red bars indicate the GL chromosomes and TQ fragments, respectively. Black ovals indicate the positions of *GCA1* and *GCA2* in NIL(*GCA1*<sup>+/+</sup>) and NIL(*GCA2*<sup>+/+</sup>).

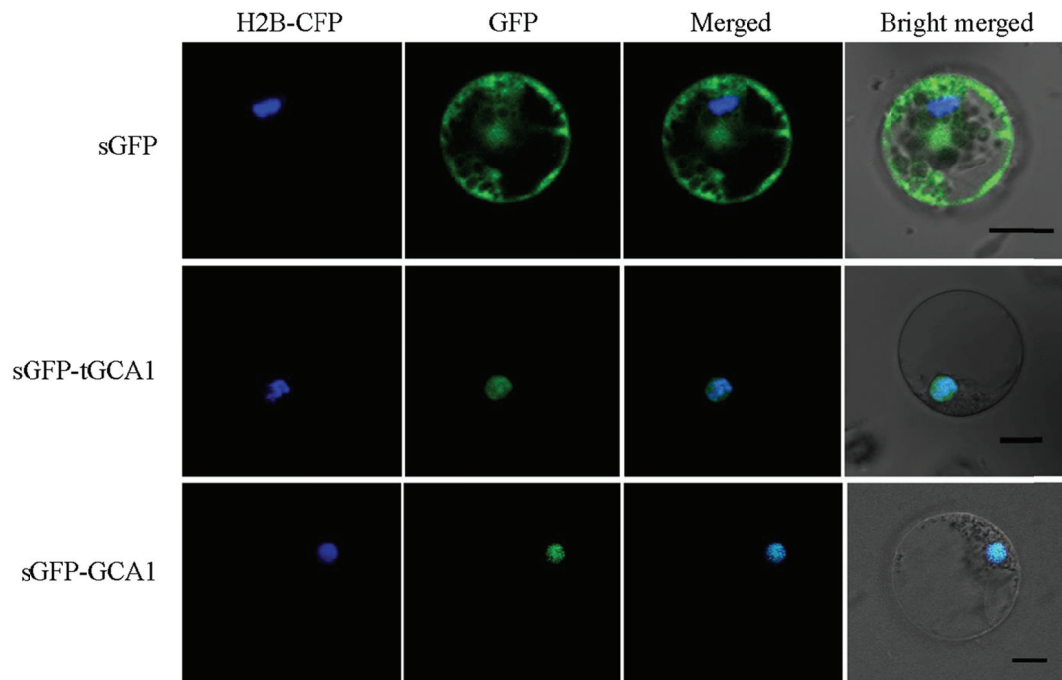

**Supplementary Figure S3. Subcellular localization of full-length (GCA1) and truncated (tGCA1) GCA1 proteins.** The fluorescence microscopic images exhibiting that sGFP alone was observed throughout the cytoplasm, whereas, the sGFP-GCA1 and sGFP-tGCA1 fusion proteins were co-localized with the nuclear marker H2B-CFP in rice protoplasts. Scale bars =10  $\mu$ m.

## Supplementary Tables

**Supplementary Table S1: Estimates of GCA effects for DTH, PH and SPP in a half-diallelic cross analysis with six rice elite varieties**

|     | YB   | ZS    | AJ    | GL    | L6   | TQ   |
|-----|------|-------|-------|-------|------|------|
| DTH | 1.8  | -6.9  | -6.4  | -6.9  | 15.4 | 3.0  |
| PH  | 1.1  | -7.8  | -6.4  | -10.5 | 16.2 | 7.4  |
| SPP | 53.7 | -30.4 | -36.1 | -38.0 | 4.2  | 46.6 |

Supplementary Table S2: Recombination events identified in the candidate region in the BC<sub>3</sub>F<sub>2</sub>-GCAI population and estimated GCA

effects for DTH, PH and SPP

| Recombinants | ID77 | S76 | ID710 | RM22140 | RM1306 | S77 | S726 | S722 | GCA-DTH | GCA-PH | GCA-SPP | progeny test |
|--------------|------|-----|-------|---------|--------|-----|------|------|---------|--------|---------|--------------|
| 270          | GL   | GL  | GL    | GL      | H      | H   | H    | H    | 3.80    | 4.52   | 4.96    | H            |
| 337          | GL   | GL  | GL    | GL      | H      | H   | H    | H    | 5.00    | 0.57   | -1.44   | H            |
| 367          | H    | H   | H     | GL      | GL     | GL  | GL   | GL   | -8.40   | -4.32  | -4.18   | GL           |
| 471          | H    | H   | H     | H       | GL     | GL  | GL   | GL   | -8.01   | -3.11  | -6.17   | GL           |
| 966          | GL   | GL  | GL    | H       | H      | H   | H    | H    | 1.21    | -0.60  | 0.39    | H            |
| 1351         | GL   | GL  | GL    | H       | H      | H   | H    | H    | 2.20    | 1.50   | 6.89    | H            |
| 1450         | GL   | GL  | H     | H       | TQ     | TQ  | TQ   | TQ   | 19.24   | 9.71   | 11.44   | TQ           |
| 1540         | H    | H   | H     | H       | GL     | GL  | GL   | GL   | -8.59   | -6.47  | -9.91   | GL           |
| 1598         | H    | GL  | GL    | GL      | GL     | GL  | GL   | GL   | -7.55   | -3.74  | -1.92   | GL           |
| 1615         | GL   | TQ  | TQ    | TQ      | TQ     | TQ  | TQ   | TQ   | 20.15   | 10.11  | 4.09    | TQ           |
| 1679         | H    | H   | H     | H       | GL     | GL  | GL   | GL   | -8.42   | -3.58  | -0.36   | GL           |
| 1847         | TQ   | H   | H     | H       | GL     | GL  | GL   | GL   | -4.19   | -2.12  | -4.58   | GL           |
| 1854         | GL   | GL  | GL    | GL      | H      | H   | H    | H    | 1.41    | 0.00   | -0.04   | H            |
| 2087         | H    | H   | H     | GL      | H      | GL  | GL   | GL   | -9.30   | -4.57  | -5.29   | GL           |
| 2108         | GL   | GL  | GL    | H       | H      | H   | H    | H    | 2.54    | 0.33   | 1.23    | H            |
| 2373         | H    | H   | H     | GL      | GL     | GL  | GL   | GL   | -7.00   | -4.35  | -6.17   | GL           |
| 2462         | H    | H   | H     | GL      | GL     | GL  | GL   | GL   | -7.85   | -5.10  | -7.85   | GL           |
| 2554         | GL   | GL  | GL    | H       | H      | H   | H    | H    | 2.45    | 2.66   | 2.82    | H            |
| 2718         | GL   | GL  | GL    | GL      | H      | H   | H    | H    | 4.79    | 0.10   | 4.43    | H            |
| 2858         | H    | H   | H     | H       | GL     | GL  | GL   | GL   | -8.30   | -3.16  | -1.31   | GL           |

|      |    |    |    |    |    |    |    |       |       |       |    |
|------|----|----|----|----|----|----|----|-------|-------|-------|----|
| 2941 | GL | GL | GL | GL | H  | H  | H  | 18.57 | 10.08 | 14.29 | TQ |
| 3034 | TQ | H  | H  | H  | H  | H  | H  | 3.20  | 4.55  | 1.28  | H  |
| 3092 | H  | H  | H  | H  | GL | GL | GL | -6.95 | -3.04 | -2.59 | GL |

Three genotype classes for respective markers and the *GCA1* locus: GL: homozygous for Guangluai #4; TQ: homozygous for Teqing; H: heterozygous. DTH, PH and SPP represent the corresponding GCA values estimated from the whole TC progenies of these recombinants. The progeny test was conducted based on the segregation conditions of the traits in the BC<sub>3</sub>F<sub>3</sub> families and TC progenies.

**Supplementary Table S3: Gene expression levels from RNA-seq data of GL and TQ in the candidate genomic region**

| Locus Name     | GL-RPKM | TQ-RPKM | $\log_2$<br>Ratio(TQ/GL) | FDR      | Gene Product Name                                                   |
|----------------|---------|---------|--------------------------|----------|---------------------------------------------------------------------|
| LOC_Os07g48890 | 2.393   | 1.888   | -0.342                   | 0.1836   | expressed protein                                                   |
| LOC_Os07g48900 | un      | un      | un                       | un       | expressed protein\BHLH protein                                      |
| LOC_Os07g48910 | 0.382   | 0.847   | 1.150                    | 0.2125   | retrotransposon protein, putative, unclassified, expressed          |
| LOC_Os07g48920 | 4.723   | 6.705   | 0.505                    | 1.39E-04 | aldehyde dehydrogenase, putative, expressed                         |
| LOC_Os07g48930 | un      | un      | un                       | un       | expressed protein                                                   |
| LOC_Os07g48940 | un      | un      | un                       | un       | OsFBDUF39 - F-box and DUF domain containing protein, expressed      |
| LOC_Os07g48950 | 0.981   | 1.209   | 0.302                    | 0.5764   | aldehyde dehydrogenase 22A1 precursor, putative, expressed          |
| LOC_Os07g48960 | 2.334   | 6.143   | 1.396                    | 6.95E-32 | OsLonP3 - Putative Lon protease homologue, expressed                |
| LOC_Os07g48970 | 20.413  | 31.628  | 0.632                    | 2.86E-24 | OsPOP17 - Putative Prolyl Oligopeptidase homologue, expressed       |
| LOC_Os07g48980 | 3.273   | 0.483   | -2.760                   | 4.07E-07 | nicotianamine synthase, putative, expressed                         |
| LOC_Os07g49000 | 0.862   | 0.242   | -1.835                   | 0.0147   | DNAJ heat shock N-terminal domain-containing protein, putative      |
| LOC_Os07g49010 | 11.787  | 11.255  | -0.067                   | 0.4882   | TOPBP1B - Similar to DNA replication protein TOPBP1 from, expressed |
| LOC_Os07g49020 | 5.361   | 3.933   | -0.447                   | 0.5781   | conserved hypothetical protein                                      |
| LOC_Os07g49030 | 18.489  | 29.559  | 0.677                    | 3.21E-19 | PHD-finger family protein, expressed                                |
| LOC_Os07g49040 | 1.143   | 2.248   | 0.976                    | 3.67E-05 | protein phosphatase protein, putative, expressed                    |
| LOC_Os07g49050 | 0.565   | 1.139   | 1.013                    | 0.3011   | hypothetical protein/Conserved gene of unknown function             |
| LOC_Os07g49060 | un      | un      | un                       | un       | retrotransposon protein, putative, unclassified                     |
| LOC_Os07g49070 | 7.484   | 11.227  | 0.585                    | 6.43E-07 | expressed protein                                                   |
| LOC_Os07g49080 | 13.983  | 29.760  | 1.090                    | 7.41E-24 | COBRA-like protein 7 precursor, putative, expressed                 |
| LOC_Os07g49090 | 4.409   | 10.042  | 1.188                    | 2.08E-04 | WD-40 repeat family protein, putative, expressed                    |
| LOC_Os07g49100 | 6.149   | 4.684   | -0.393                   | 0.1267   | pectinesterase, putative, expressed                                 |
| LOC_Os07g49110 | 58.004  | 78.036  | 0.428                    | 2.25E-47 | D-alanine--D-alanine ligase family, putative, expressed             |



**Supplementary Table S3 (Continued)**

| Locus Name            | GL-RPKM      | TQ-RPKM       | log <sub>2</sub><br>Ratio(TQ/GL) | FDR             | Gene Product Name                                                         |
|-----------------------|--------------|---------------|----------------------------------|-----------------|---------------------------------------------------------------------------|
| LOC_Os07g49114        | 19.734       | 6.137         | -1.685                           | 7.13E-12        | wound-induced protein W112, putative, expressed                           |
| LOC_Os07g49120        | un           | un            | un                               | un              | sex determination protein tasselseed-2, putative, expressed               |
| LOC_Os07g49130        | un           | un            | un                               | un              | expressed protein                                                         |
| LOC_Os07g49140        | 7.522        | 4.571         | -0.718                           | 4.17E-06        | expressed protein                                                         |
| <b>LOC_Os07g49150</b> | <b>8.543</b> | <b>17.853</b> | <b>1.063</b>                     | <b>8.83E-26</b> | <b>26S protease regulatory subunit 4, putative, expressed</b>             |
| LOC_Os07g49160        | 0.090        | 0.001         | -6.493                           | 0.3419          | retrotransposon protein, putative, unclassified, expressed                |
| LOC_Os07g49170        | un           | un            | un                               | un              | retrotransposon protein, putative, unclassified, expressed                |
| LOC_Os07g49180        | 0.501        | 0.276         | -0.862                           | 0.3544          | retrotransposon protein, putative, unclassified, expressed                |
| LOC_Os07g49190        | un           | un            | un                               | un              | retrotransposon protein, putative, unclassified                           |
| LOC_Os07g49200        | 0.782        | 0.394         | -0.987                           | 0.4453          | membrane associated DUF588 domain containing protein, putative, expressed |
| LOC_Os07g49210        | 2.029        | 3.140         | 0.630                            | 3.85E-05        | helicase conserved C-terminal domain containing protein, expressed        |
| LOC_Os07g49220        | 0.057        | 0.001         | -5.825                           | 0.5712          | expressed protein                                                         |
| <b>LOC_Os07g49230</b> | <b>1.672</b> | <b>5.891</b>  | <b>1.817</b>                     | <b>3.51E-21</b> | <b>ubiquitin-activating enzyme, putative, expressed</b>                   |
| LOC_Os07g49240        | 12.263       | 4.454         | -1.461                           | 2.80E-19        | MRH1, putative, expressed                                                 |
| LOC_Os07g49250        | un           | un            | un                               | un              | thiamine pyrophosphate enzyme, C-terminal TPP binding domain protein      |
| LOC_Os07g49260        | 4.167        | 4.979         | 0.257                            | 0.0623          | importin subunit beta, putative, expressed                                |
| LOC_Os07g49270        | 7.600        | 10.532        | 0.471                            | 1.66E-07        | AMP deaminase, putative, expressed                                        |
| LOC_Os07g49280        | 5.249        | 15.886        | 1.598                            | 1.45E-45        | PMR5, putative, expressed                                                 |
| LOC_Os07g49290        | un           | un            | un                               | un              | PHD finger family protein, putative, expressed                            |
| LOC_Os07g49300        | 23.442       | 25.900        | 0.144                            | 0.0111          | expressed protein                                                         |
| LOC_Os07g49310        | 9.841        | 6.994         | -0.493                           | 0.0025          | omega-3 fatty acid desaturase, chloroplast precursor, putative, expressed |
| LOC_Os07g49320        | 9.687        | 8.872         | -0.127                           | 0.1310          | HEAT repeat family protein, putative, expressed                           |

**Supplementary Table S3 (Continued)**

| Locus Name     | GL-RPKM | TQ-RPKM | log2<br>Ratio(TQ/GL) | FDR      | Gene Product Name                                                        |
|----------------|---------|---------|----------------------|----------|--------------------------------------------------------------------------|
| LOC_Os07g49330 | 53.130  | 48.107  | -0.143               | 0.0281   | phospholipase C, putative, expressed                                     |
| LOC_Os07g49340 | un      | un      | un                   | un       | transposon protein, putative, Mariner sub-class, expressed               |
| LOC_Os07g49350 | un      | un      | un                   | un       | expressed protein                                                        |
| LOC_Os07g49360 | 1.439   | 0.484   | -1.572               | 0.0523   | peroxidase precursor, putative, expressed                                |
| LOC_Os07g49370 | 0.221   | 0.111   | -0.987               | 0.3175   | glycosyltransferase family 43 protein, putative, expressed               |
| LOC_Os07g49380 | 27.082  | 27.407  | 0.017                | 0.8664   | PWWP domain containing protein, expressed                                |
| LOC_Os07g49390 | 41.878  | 30.650  | -0.450               | 9.37E-11 | P-protein, putative, expressed                                           |
| LOC_Os07g49400 | 86.375  | 108.185 | 0.325                | 2.53E-12 | OsAPx2 - Cytosolic Ascorbate Peroxidase encoding gene 4,5,6,8, expressed |
| LOC_Os07g49410 | 11.964  | 12.975  | 0.117                | 0.3394   | uncharacterized ACR, YagE family COG1723 containing protein, expressed   |
| LOC_Os07g49420 | un      | un      | un                   | un       | retrotransposon protein, putative, unclassified, expressed               |
| LOC_Os07g49430 | 0.023   | 0.184   | 3.013                | 0.0396   | retrotransposon protein, putative, unclassified, expressed               |
| LOC_Os07g49440 | 0.036   | 0.109   | 1.598                | 0.4671   | retrotransposon protein, putative, unclassified, expressed               |
| LOC_Os07g49460 | 143.731 | 47.583  | -1.595               | 0.00E+00 | response regulator receiver domain containing protein, expressed         |
| LOC_Os07g49470 | 12.708  | 7.267   | -0.806               | 2.98E-08 | protein kinase APK1B, chloroplast precursor, putative, expressed         |
| LOC_Os07g49480 | 24.941  | 22.523  | -0.147               | 0.0617   | (Kinase interacting protein 1)KIP1, putative, expressed                  |
| LOC_Os07g49490 | un      | un      | un                   | un       | retrotransposon protein, putative, unclassified, expressed               |
| LOC_Os07g49500 | 0.023   | 0.023   | 0.013                | 0.9942   | retrotransposon protein, putative, unclassified, expressed               |
| LOC_Os07g49510 | 8.506   | 11.374  | 0.419                | 0.0031   | expressed protein;                                                       |
| LOC_Os07g49520 | 2.579   | 8.921   | 1.790                | 1.57E-35 | 2-oxoglutarate dehydrogenase E1 component, mitochondrial precursor       |
| LOC_Os07g49530 | 3.966   | 7.512   | 0.922                | 1.82E-06 | MYB family transcription factor, putative, expressed                     |
| LOC_Os07g49540 | un      | un      | un                   | un       | expressed protein                                                        |

**Supplementary Table S4: Trait performance of NILs and  $GCAI^{OX}$** **transgene-negative segregates (Neg), transgene-positive homozygotes (Pos)**

| Genotype            | DTH       | PH(cm)    | SPP        |
|---------------------|-----------|-----------|------------|
| NIL( $GCAI^{-/-}$ ) | 70.9±0.8  | 85.9±1.9  | 153.4±12.3 |
| NIL( $GCAI^{+/+}$ ) | 90.2±0.7  | 108.5±2.2 | 215.3±10.4 |
| <i>P</i> -value     | 6.54E-44  | 1.32E-30  | 7.39E-20   |
| $GCAI^{OX}$ -5(Neg) | 71.1±1.4  | 80.7±3.8  | 119.9±8.5  |
| $GCAI^{OX}$ -5(Pos) | 103.6±1.3 | 104.6±3.0 | 182.5±9.8  |
| <i>P</i> -value     | 2.41E-42  | 1.51E-23  | 3.47E-23   |
| $GCAI^{OX}$ -9(Neg) | 69.0±1.4  | 81.6±2.1  | 121.3±8.9  |
| $GCAI^{OX}$ -9(Pos) | 104.5±1.8 | 108.9±2.5 | 185.7±8.7  |
| <i>P</i> -value     | 4.59E-42  | 6.62E-32  | 3.03E-24   |

Means ± standard deviations were obtained from 20 plants for each genotype cultivated at Wuhan in the summer of 2014. The Student's *t*-test was used to reveal any significant differences in the agronomic traits between the different genotypes within NILs and  $GCAI^{OX}$  transgenic lines. The *P*-value was calculated with one-tailed *t*-test between the genotypes.

**Supplementary Table S5: Molecular markers used in the fine mapping of *GCA1***

| Marker name | Forward primer (5'-3')     | Reverse primer (5'-3')    |
|-------------|----------------------------|---------------------------|
| RM22140     | GCAAAGCCAGGAGGTCTCTACC     | TCAAGAAACCCGAAACACGGAAGC  |
| RM1306      | AGTCTCAAAGGCATACAGTACACACC | GCCAAATTACCTTCCCGTACATAGC |
| ID77        | GGAAATGGTAGGAACCGGATTA     | AAGCGACA AAGCCCCAACCGA    |
| ID710       | TGTGGGGTTAGGTTAGGAGCT      | GGAAATCTTGCCATGTTGGTGAG   |
| S76         | CTGCTGGATTTCAGTGGTCGTAT    | TCAAAGATGGGCTCTTTCTGTTC   |
| S77         | CCCGCGATTAAAGGAACGAAACC    | CGGAAGCAGGAGCAAGAAAGCAT   |
| S726        | CGACAAGATCGTAATCGAAAGAT    | GGAGCAGGCAACAGTAGACAC     |
| S722        | ACTTATTACCGTTGGTGGATG      | AAAGAAGATGCCTCAGGAGTT     |

The SSR marker information was obtained from the Gramene website (<http://www.gramene.org/>). The indel and SNP marker information was obtained from previous genome sequencing data.

**Supplementary Table S6: Primers used in this study**

| Primer name | Forward primer (5'-3')                     |
|-------------|--------------------------------------------|
| 371F        | CGGGATCCATGATGGGAACCGCTC                   |
| 371R        | AAAACCTGCAGAGGTCATCTGTCCGCTG               |
| 372R        | AAAACCTGCAGCTAGGCTTTGTCATTTGTAGTGGAACCCATG |
| q37.1F      | CCACTACAAAGAACGTTGTGACAAA                  |
| q37.1R      | CCATTAGCCTTAACAGCTGAGGGT                   |
| qActF       | TGTATGCCAGTGGTCGTACCA                      |
| qActR       | CCAGCAAGGTCGAGACGAA                        |
| Hom1F       | AATCCTGTTGCCGGTCTTG                        |
| Hom1R       | ATGTATAATTGCGGGACTCTAATC                   |
| RBE4F       | GTTTTAGTTGGGTGAAAGCGGT                     |
| RBE4R       | CCTGTTAGTTCTTCCAATGCCCTTA                  |

Primers 371F/371R and 371F/372R were designed for the amplification of full-length and truncated CDSs of *GCA1*, respectively. Primers q37.1F/q37.1R were designed for mRNA quantification of the TQ allele of *GCA1*, and qActF/qActR were used as an internal control. Primers Hom1F/Hom1R were used to identify the homozygous transgenic lines, and RBE4F/RBE4R were used as an internal control.
